# Supplementary material for: Shifts in stability and control effectiveness during evolution of Paraves support aerial maneuvering hypotheses for flight origins
Source: PubMed Central journal article supplement (PMC4203027; doi:10.7717/peerj.632), 2014-10-16
Supplement: peerj-02-632-s001.pdf [file peerj-02-632-s001.pdf]

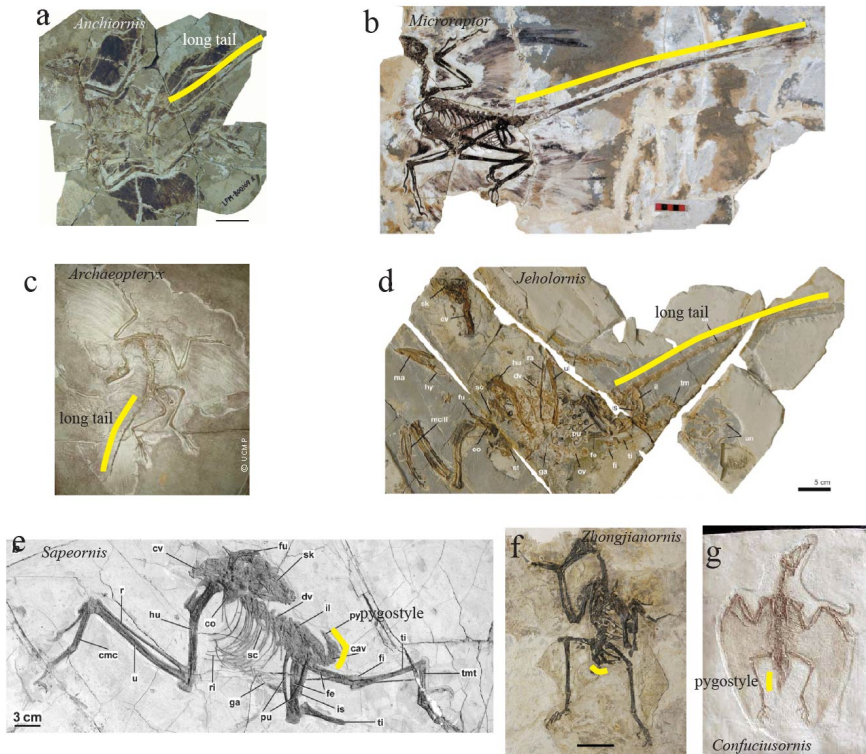

**Figure S1.** Fossils paravians (Xu et al., 2011) used for comparative study. (a) *Anchiornis* (Hu et al., 2009); (b) *Microraptor* (Xu et al., 2003; Li et al., 2012); (c) *Archaeopteryx* (Benton, 2005; Longrich, 2006), (d) *Jeholornis* (Zhou et al., 2002; Zhou and Zhang, 2003b; O'Connor et al., 2012; O'Connor et al., 2013), (e) *Sapeornis* (Zhou and Zhang, 2003b; Zheng et al., 2013), (f) *Zhongjianornis* (Zhou and Li, 2010) and (g) *Confuciusornis* (Gao et al., 2008; Hou et al., 1995; Chiappe et al., 1999). Subsequent specimens suggest *Sapeornis* has a long tail and a more basal phylogenetic placement than *Jeholornis* (Zheng et al., 2013; Turner et al., 2012).

**Table S1.** (a) Pitch static stability and equilibrium point, (b) control effectiveness in pitch using tail dorsiflexion (Figure 3b), (c) control effectiveness in pitch using symmetric wing protraction/retraction (wing sweep, Figure 3a). Results give mean  $\pm$  s.d.,  $n = 15$  for stability,  $n = 5$  for control effectiveness; units for stability and control effectiveness are  $\text{rad}^{-1}$ .

|                        | pitch stability, $dC_m/d\alpha$ |                     |                     | equilibrium point |                            |
|------------------------|---------------------------------|---------------------|---------------------|-------------------|----------------------------|
|                        | $\alpha = 0^\circ$              | $\alpha = 15^\circ$ | $\alpha = 75^\circ$ | $\alpha^\circ$    | equilibrium $dC_m/d\alpha$ |
| <i>Anchiornis</i>      | -0.005 $\pm$ 0.013              | -0.067 $\pm$ 0.012  | -0.13 $\pm$ 0.03    | 29 $\pm$ 2        | -0.170 $\pm$ 0.028         |
| <i>Archaeopteryx</i>   | -0.134 $\pm$ 0.013              | -0.221 $\pm$ 0.020  | -0.18 $\pm$ 0.03    | 9 $\pm$ 2         | -0.190 $\pm$ 0.012         |
| <i>Confuciusornis</i>  | 0.142 $\pm$ 0.009               | 0.039 $\pm$ 0.020   | -0.06 $\pm$ 0.02    | 0 $\pm$ 2         | 0.142 $\pm$ 0.009          |
| <i>Jeholornis</i>      | 0.011 $\pm$ 0.018               | -0.108 $\pm$ 0.010  | -0.10 $\pm$ 0.02    | 25 $\pm$ 1        | -0.120 $\pm$ 0.044         |
| <i>Microraptor</i>     | -0.039 $\pm$ 0.006              | -0.071 $\pm$ 0.009  | -0.17 $\pm$ 0.02    | 20 $\pm$ 2        | -0.070 $\pm$ 0.029         |
| <i>Sapeornis</i>       | 0.109 $\pm$ 0.010               | 0.007 $\pm$ 0.011   | -0.11 $\pm$ 0.02    | 5 $\pm$ 2         | 0.100 $\pm$ 0.052          |
| <i>Zhongjianornis</i>  | 0.305 $\pm$ 0.036               | 0.195 $\pm$ 0.027   | -0.15 $\pm$ 0.16    | 5 $\pm$ 1         | 0.180 $\pm$ 0.078          |
| <i>Allectoris</i>      | 0.206 $\pm$ 0.006               | 0.090 $\pm$ 0.020   | -0.37 $\pm$ 0.16    | 0 $\pm$ 1         | 0.120 $\pm$ 0.013          |
| <i>Buteo</i>           | 0.187 $\pm$ 0.010               | -0.042 $\pm$ 0.009  | -0.13 $\pm$ 0.02    | 0 $\pm$ 3         | 0.140 $\pm$ 0.030          |
| <i>Columba</i>         | 0.046 $\pm$ 0.014               | -0.047 $\pm$ 0.017  | -0.18 $\pm$ 0.16    | 0 $\pm$ 6         | 0.050 $\pm$ 0.088          |
| <i>Larus</i>           | 0.352 $\pm$ 0.028               | 0.092 $\pm$ 0.015   | -0.10 $\pm$ 0.02    | 0 $\pm$ 1         | 0.150 $\pm$ 0.049          |
| <i>Onychonycteris</i>  | -0.011 $\pm$ 0.011              | 0.112 $\pm$ 0.005   | -0.12 $\pm$ 0.02    | 10 $\pm$ 2        | -0.011 $\pm$ 0.033         |
| <i>Pteropus</i>        | -0.118 $\pm$ 0.014              | 0.055 $\pm$ 0.008   | -0.10 $\pm$ 0.02    | 0 $\pm$ 2         | -0.080 $\pm$ 0.015         |
| <i>Pteranodon</i>      | 0.054 $\pm$ 0.023               | 0.004 $\pm$ 0.018   | -0.07 $\pm$ 0.04    | 5 $\pm$ 3         | -0.050 $\pm$ 0.029         |
| <i>Pterodactylus</i>   | 0.200 $\pm$ 0.020               | -0.050 $\pm$ 0.009  | -0.05 $\pm$ 0.03    | 0 $\pm$ 4         | -0.040 $\pm$ 0.009         |
| <i>Rhamphorhynchus</i> | -0.062 $\pm$ 0.013              | -0.192 $\pm$ 0.024  | -0.05 $\pm$ 0.01    | 15 $\pm$ 1        | -0.018 $\pm$ 0.044         |
| Sphere                 | -0.037 $\pm$ 0.023              | -0.020 $\pm$ 0.022  | -0.03 $\pm$ 0.01    |                   | -0.050 $\pm$ 0.006         |
| Weathervane            | -0.333 $\pm$ 0.040              | -0.347 $\pm$ 0.020  | -0.03 $\pm$ 0.04    | 0 $\pm$ 2         | -0.210 $\pm$ 0.055         |

  

|                        | $dC_m/d\delta$ , tail dorsiflexion <sup>1</sup> |                     |                     | $dC_m/d\delta$ , sym protraction / wing sweep <sup>2</sup> |                     |                     |
|------------------------|-------------------------------------------------|---------------------|---------------------|------------------------------------------------------------|---------------------|---------------------|
|                        | $\alpha = 0^\circ$                              | $\alpha = 15^\circ$ | $\alpha = 75^\circ$ | $\alpha = 0^\circ$                                         | $\alpha = 15^\circ$ | $\alpha = 75^\circ$ |
| <i>Anchiornis</i>      | 0.168 $\pm$ 0.002                               | 0.191 $\pm$ 0.006   | 0.047 $\pm$ 0.012   | 0.00 $\pm$ 0.020                                           | 0.050 $\pm$ 0.020   | 0.070 $\pm$ 0.004   |
| <i>Archaeopteryx</i>   | 0.219 $\pm$ 0.007                               | 0.190 $\pm$ 0.010   | 0.065 $\pm$ 0.024   | -0.003 $\pm$ 0.016                                         | 0.060 $\pm$ 0.018   | 0.128 $\pm$ 0.004   |
| <i>Confuciusornis</i>  | 0.011 $\pm$ 0.003                               | 0.013 $\pm$ 0.003   | 0.018 $\pm$ 0.005   | 0.006 $\pm$ 0.034                                          | 0.117 $\pm$ 0.023   | 0.229 $\pm$ 0.002   |
| <i>Jeholornis</i>      | 0.268 $\pm$ 0.019                               | 0.223 $\pm$ 0.001   | 0.068 $\pm$ 0.005   | 0.042 $\pm$ 0.009                                          | 0.072 $\pm$ 0.006   | 0.088 $\pm$ 0.002   |
| <i>Microraptor</i>     | 0.174 $\pm$ 0.023                               | 0.125 $\pm$ 0.002   | 0.089 $\pm$ 0.014   | 0.018 $\pm$ 0.008                                          | 0.037 $\pm$ 0.003   | 0.051 $\pm$ 0.004   |
| <i>Sapeornis</i>       | 0.054 $\pm$ 0.001                               | 0.064 $\pm$ 0.005   | 0.082 $\pm$ 0.006   | 0.022 $\pm$ 0.038                                          | 0.173 $\pm$ 0.039   | 0.329 $\pm$ 0.001   |
| <i>Zhongjianornis</i>  | 0.023 $\pm$ 0.004                               | 0.019 $\pm$ 0.004   | 0.012 $\pm$ 0.026   | 0.025 $\pm$ 0.027                                          | 0.119 $\pm$ 0.023   | 0.221 $\pm$ 0.001   |
| <i>Allectoris</i>      | 0.011 $\pm$ 0.004                               | 0.012 $\pm$ 0.005   | 0.044 $\pm$ 0.007   | -0.001 $\pm$ 0.017                                         | 0.124 $\pm$ 0.020   | 0.119 $\pm$ 0.002   |
| <i>Buteo</i>           | 0.018 $\pm$ 0.003                               | 0.033 $\pm$ 0.012   | 0.049 $\pm$ 0.006   | 0.043 $\pm$ 0.034                                          | 0.142 $\pm$ 0.021   | 0.213 $\pm$ 0.001   |
| <i>Columba</i>         | 0.044 $\pm$ 0.004                               | 0.050 $\pm$ 0.003   | 0.009 $\pm$ 0.002   | 0.076 $\pm$ 0.027                                          | 0.151 $\pm$ 0.013   | 0.168 $\pm$ 0.002   |
| <i>Larus</i>           | 0.014 $\pm$ 0.008                               | 0.016 $\pm$ 0.003   | 0.014 $\pm$ 0.008   | -0.007 $\pm$ 0.030                                         | 0.110 $\pm$ 0.032   | 0.231 $\pm$ 0.001   |
| <i>Onychonycteris</i>  | 0.029 $\pm$ 0.004                               | 0.032 $\pm$ 0.002   | 0.004 $\pm$ 0.004   | 0.031 $\pm$ 0.030                                          | 0.152 $\pm$ 0.031   | 0.235 $\pm$ 0.003   |
| <i>Pteropus</i>        | 0.053 $\pm$ 0.009                               | 0.026 $\pm$ 0.003   | 0.026 $\pm$ 0.002   | -0.005 $\pm$ 0.041                                         | 0.131 $\pm$ 0.030   | 0.230 $\pm$ 0.002   |
| <i>Pteranodon</i>      | 0.016 $\pm$ 0.005                               | 0.015 $\pm$ 0.002   | 0.016 $\pm$ 0.003   | 0.167 $\pm$ 0.050                                          | 0.315 $\pm$ 0.033   | 0.480 $\pm$ 0.001   |
| <i>Pterodactylus</i>   | 0.015 $\pm$ 0.002                               | 0.025 $\pm$ 0.004   | 0.039 $\pm$ 0.005   | 0.005 $\pm$ 0.026                                          | 0.088 $\pm$ 0.018   | 0.141 $\pm$ 0.002   |
| <i>Rhamphorhynchus</i> | 0.347 $\pm$ 0.016                               | 0.245 $\pm$ 0.032   | 0.029 $\pm$ 0.010   | 0.012 $\pm$ 0.025                                          | 0.045 $\pm$ 0.020   | 0.175 $\pm$ 0.001   |

<sup>1</sup>movement depicted in Figure 3b

<sup>2</sup>movement depicted in Figure 3a

**Table S2.** (a) Roll static stability and (b) control effectiveness in roll for asymmetric wing tucking (Figure 3c). Results give mean  $\pm$  s.d. for  $n = 15$ ; units for stability and control effectiveness are  $\text{rad}^{-1}$ . Equilibrium point in roll is at  $\phi = 0^\circ$ .

|                        | roll stability, $dC_r/d\phi$ |                     | $dC_r/d\delta$ , asymmetric wing tuck <sup>1</sup> |                     |
|------------------------|------------------------------|---------------------|----------------------------------------------------|---------------------|
|                        | $\alpha = 15^\circ$          | $\alpha = 75^\circ$ | $\alpha = 15^\circ$                                | $\alpha = 75^\circ$ |
| <i>Anchiornis</i>      |                              |                     |                                                    |                     |
| <i>Archaeopteryx</i>   | 0.009 $\pm$ 0.06             | -0.200 $\pm$ 0.019  | 0.090 $\pm$ 0.005                                  | 0.200 $\pm$ 0.018   |
| <i>Confuciusornis</i>  | -0.020 $\pm$ 0.02            | -0.200 $\pm$ 0.009  | 0.050 $\pm$ 0.002                                  | 0.100 $\pm$ 0.012   |
| <i>Jeholornis</i>      | 0.073 $\pm$ 0.03             | -0.400 $\pm$ 0.025  | 0.080 $\pm$ 0.004                                  | 0.120 $\pm$ 0.024   |
| <i>Microraptor</i>     | 0.132 $\pm$ 0.03             | -0.300 $\pm$ 0.019  | 0.050 $\pm$ 0.007                                  | 0.170 $\pm$ 0.021   |
| <i>Sapeornis</i>       | 0.043 $\pm$ 0.04             | -0.300 $\pm$ 0.026  | 0.080 $\pm$ 0.002                                  | 0.130 $\pm$ 0.016   |
| <i>Zhongjianornis</i>  | 0.030 $\pm$ 0.02             | -0.200 $\pm$ 0.012  | 0.050 $\pm$ 0.001                                  | 0.140 $\pm$ 0.015   |
| <i>Allectoris</i>      | 0.009 $\pm$ 0.06             | -0.100 $\pm$ 0.016  | 0.060 $\pm$ 0.002                                  | 0.080 $\pm$ 0.007   |
| <i>Buteo</i>           | 0.028 $\pm$ 0.05             | -0.400 $\pm$ 0.022  | 0.170 $\pm$ 0.012                                  | 0.240 $\pm$ 0.055   |
| <i>Columba</i>         | -0.030 $\pm$ 0.05            | -0.300 $\pm$ 0.014  | 0.180 $\pm$ 0.007                                  | 0.180 $\pm$ 0.027   |
| <i>Larus</i>           | -0.009 $\pm$ 0.02            | -0.400 $\pm$ 0.028  | 0.150 $\pm$ 0.004                                  | 0.200 $\pm$ 0.038   |
| <i>Onychonycteris</i>  |                              | -1.000 $\pm$ 0.044  | 0.810 $\pm$ 0.036                                  | 0.880 $\pm$ 0.100   |
| <i>Pteropus</i>        | -0.027 $\pm$ 0.05            | -0.700 $\pm$ 0.064  | 0.680 $\pm$ 0.020                                  | 0.830 $\pm$ 0.088   |
| <i>Pteranodon</i>      | 0.011 $\pm$ 0.02             | -0.200 $\pm$ 0.014  | 0.070 $\pm$ 0.002                                  | 0.100 $\pm$ 0.010   |
| <i>Pterodactylus</i>   | -0.002 $\pm$ 0.06            | -0.300 $\pm$ 0.016  | 0.100 $\pm$ 0.003                                  | 0.110 $\pm$ 0.027   |
| <i>Rhamphorhynchus</i> | -0.069 $\pm$ 0.03            | -0.400 $\pm$ 0.021  | 0.160 $\pm$ 0.007                                  | 0.210 $\pm$ 0.030   |

<sup>1</sup>movement depicted in Figure 3c

**Table S3.** (a) Yaw static stability, (b) control effectiveness in yaw using tail lateral flexion (Figure 3d), (c) control effectiveness in yaw using wing pronation/supination (Figure 3e), (d) control effectiveness in yaw using lateral head flexion for pterosaurs only. Results give mean  $\pm$  s.d.,  $n = 15$  for stability,  $n = 5$  for control effectiveness; units for stability and control effectiveness are  $\text{rad}^{-1}$ . Equilibrium point in yaw is at  $\psi = 0^\circ$ .

| a                           |                     |  |                     |  |  |  |
|-----------------------------|---------------------|--|---------------------|--|--|--|
| yaw stability, $dC_y/d\psi$ |                     |  |                     |  |  |  |
|                             | $\alpha = 15^\circ$ |  | $\alpha = 75^\circ$ |  |  |  |
| <i>Anchiornis</i>           | -0.097 $\pm$ 0.003  |  | 0.006 $\pm$ 0.006   |  |  |  |
| <i>Archaeopteryx</i>        | -0.070 $\pm$ 0.004  |  | 0.010 $\pm$ 0.004   |  |  |  |
| <i>Confuciusornis</i>       | -0.026 $\pm$ 0.002  |  | 0.004 $\pm$ 0.002   |  |  |  |
| <i>Jeholornis</i>           | -0.091 $\pm$ 0.003  |  | 0.002 $\pm$ 0.001   |  |  |  |
| <i>Microraptor</i>          | -0.100 $\pm$ 0.016  |  | 0.039 $\pm$ 0.010   |  |  |  |
| <i>Sapeornis</i>            | 0.002 $\pm$ 0.003   |  | 0.005 $\pm$ 0.001   |  |  |  |
| <i>Zhongjianornis</i>       | 0.021 $\pm$ 0.003   |  | 0.008 $\pm$ 0.002   |  |  |  |
| <i>Alectoris</i>            | 0.022 $\pm$ 0.001   |  | 0.001 $\pm$ 0.002   |  |  |  |
| <i>Buteo</i>                | 0.027 $\pm$ 0.006   |  | -0.002 $\pm$ 0.004  |  |  |  |
| <i>Columba</i>              | 0.048 $\pm$ 0.002   |  | 0.003 $\pm$ 0.002   |  |  |  |
| <i>Larus</i>                | 0.017 $\pm$ 0.004   |  | 0.002 $\pm$ 0.002   |  |  |  |
| <i>Onychonycteris</i>       | 0.025 $\pm$ 0.008   |  | -0.004 $\pm$ 0.007  |  |  |  |
| <i>Pteropus</i>             | 0.040 $\pm$ 0.025   |  | -0.016 $\pm$ 0.005  |  |  |  |
| <i>Pteranodon</i>           | 0.026 $\pm$ 0.002   |  | 0.002 $\pm$ 0.001   |  |  |  |
| <i>Pterodactylus</i>        | -0.002 $\pm$ 0.001  |  | 0.002 $\pm$ 0.001   |  |  |  |
| <i>Rhamphorhynchus</i>      | -0.052 $\pm$ 0.004  |  | -0.034 $\pm$ 0.004  |  |  |  |

  

| b                                                  |                     |                   |                     |                   |                    |                    |
|----------------------------------------------------|---------------------|-------------------|---------------------|-------------------|--------------------|--------------------|
| $dC_y/d\delta$ , lateral tail flexion <sup>1</sup> |                     |                   |                     |                   |                    |                    |
|                                                    | $\alpha = 15^\circ$ |                   | $\alpha = 75^\circ$ |                   |                    |                    |
| <i>Anchiornis</i>                                  | 0.239 $\pm$ 0.070   |                   | 0.069 $\pm$ 0.013   |                   |                    |                    |
| <i>Archaeopteryx</i>                               | 0.220 $\pm$ 0.071   |                   | 0.066 $\pm$ 0.004   |                   |                    |                    |
| <i>Confuciusornis</i>                              | 0.002 $\pm$ 0.008   |                   | -0.004 $\pm$ 0.001  |                   |                    |                    |
| <i>Jeholornis</i>                                  |                     |                   | -0.027 $\pm$ 0.007  |                   |                    |                    |
| <i>Microraptor</i>                                 | 0.520 $\pm$ 0.083   |                   | -0.076 $\pm$ 0.010  |                   |                    |                    |
| <i>Sapeornis</i>                                   |                     |                   |                     |                   |                    |                    |
| <i>Zhongjianornis</i>                              | -0.001 $\pm$ 0.002  |                   | -0.007 $\pm$ 0.001  |                   |                    |                    |
| <i>Alectoris</i>                                   | 0.019 $\pm$ 0.012   |                   | -0.050 $\pm$ 0.001  |                   |                    |                    |
| <i>Buteo</i>                                       | -0.007 $\pm$ 0.003  |                   | -0.029 $\pm$ 0.003  |                   |                    |                    |
| <i>Columba</i>                                     | 0.005 $\pm$ 0.002   |                   | -0.022 $\pm$ 0.001  |                   |                    |                    |
| <i>Larus</i>                                       |                     |                   | -0.012 $\pm$ 0.002  |                   |                    |                    |
| <i>Onychonycteris</i>                              | -0.011 $\pm$ 0.005  |                   | -0.012 $\pm$ 0.003  |                   |                    |                    |
| <i>Pteropus</i>                                    |                     |                   |                     |                   |                    |                    |
| <i>Pteranodon</i>                                  |                     |                   |                     | 0.271 $\pm$ 0.013 | 0.234 $\pm$ 0.004  | 0.120 $\pm$ 0.002  |
| <i>Pterodactylus</i>                               |                     |                   |                     | 0.196 $\pm$ 0.014 | 0.139 $\pm$ 0.013  | 0.190 $\pm$ 0.003  |
| <i>Rhamphorhynchus</i>                             | 0.170 $\pm$ 0.008   | 0.128 $\pm$ 0.002 | 0.279 $\pm$ 0.027   | 0.319 $\pm$ 0.024 | -0.033 $\pm$ 0.009 | -0.003 $\pm$ 0.001 |

  

| c                                          |                     |  |                     |  |  |  |
|--------------------------------------------|---------------------|--|---------------------|--|--|--|
| $dC_y/d\delta$ , wing pro/sup <sup>2</sup> |                     |  |                     |  |  |  |
|                                            | $\alpha = 15^\circ$ |  | $\alpha = 75^\circ$ |  |  |  |
| <i>Anchiornis</i>                          | 0.199 $\pm$ 0.020   |  | 0.330 $\pm$ 0.004   |  |  |  |
| <i>Archaeopteryx</i>                       | 0.420 $\pm$ 0.015   |  | 0.383 $\pm$ 0.016   |  |  |  |
| <i>Confuciusornis</i>                      | 0.206 $\pm$ 0.025   |  | 0.184 $\pm$ 0.007   |  |  |  |
| <i>Jeholornis</i>                          |                     |  |                     |  |  |  |
| <i>Microraptor</i>                         | 0.259 $\pm$ 0.013   |  | 0.373 $\pm$ 0.008   |  |  |  |
| <i>Sapeornis</i>                           |                     |  |                     |  |  |  |
| <i>Zhongjianornis</i>                      | 0.296 $\pm$ 0.015   |  | 0.262 $\pm$ 0.015   |  |  |  |
| <i>Alectoris</i>                           | 0.081 $\pm$ 0.013   |  | 0.093 $\pm$ 0.004   |  |  |  |
| <i>Buteo</i>                               | 0.565 $\pm$ 0.060   |  | 0.431 $\pm$ 0.025   |  |  |  |
| <i>Columba</i>                             | 0.455 $\pm$ 0.042   |  | 0.204 $\pm$ 0.003   |  |  |  |
| <i>Larus</i>                               |                     |  |                     |  |  |  |
| <i>Onychonycteris</i>                      | 0.870 $\pm$ 0.093   |  | 0.627 $\pm$ 0.049   |  |  |  |
| <i>Pteropus</i>                            |                     |  |                     |  |  |  |
| <i>Pteranodon</i>                          |                     |  |                     |  |  |  |
| <i>Pterodactylus</i>                       |                     |  |                     |  |  |  |
| <i>Rhamphorhynchus</i>                     |                     |  |                     |  |  |  |

  

| d                                     |                     |  |                     |  |  |  |
|---------------------------------------|---------------------|--|---------------------|--|--|--|
| $dC_y/d\delta$ , lateral head flexion |                     |  |                     |  |  |  |
|                                       | $\alpha = 15^\circ$ |  | $\alpha = 75^\circ$ |  |  |  |
| <i>Anchiornis</i>                     |                     |  |                     |  |  |  |
| <i>Archaeopteryx</i>                  |                     |  |                     |  |  |  |
| <i>Confuciusornis</i>                 |                     |  |                     |  |  |  |
| <i>Jeholornis</i>                     |                     |  |                     |  |  |  |
| <i>Microraptor</i>                    |                     |  |                     |  |  |  |
| <i>Sapeornis</i>                      |                     |  |                     |  |  |  |
| <i>Zhongjianornis</i>                 |                     |  |                     |  |  |  |
| <i>Alectoris</i>                      |                     |  |                     |  |  |  |
| <i>Buteo</i>                          |                     |  |                     |  |  |  |
| <i>Columba</i>                        |                     |  |                     |  |  |  |
| <i>Larus</i>                          |                     |  |                     |  |  |  |
| <i>Onychonycteris</i>                 |                     |  |                     |  |  |  |
| <i>Pteropus</i>                       |                     |  |                     |  |  |  |
| <i>Pteranodon</i>                     |                     |  |                     |  |  |  |
| <i>Pterodactylus</i>                  |                     |  |                     |  |  |  |
| <i>Rhamphorhynchus</i>                |                     |  |                     |  |  |  |

<sup>1</sup> movement depicted in Figure 3d <sup>2</sup> movement depicted in Figure 3e

**Table S4.** Fossil paravians (Xu et al., 2011) sampled for aerodynamic testing and references used during model construction.

| specimen and reference |                                                                                                   | approx length<br>$\times 10^{-2}$ m |
|------------------------|---------------------------------------------------------------------------------------------------|-------------------------------------|
| <i>Anchiornis</i>      | LPM B00169 (Hu et al., 2009)                                                                      | 42                                  |
| <i>Archaeopteryx</i>   | Berlin (Benton, 2005; Longrich, 2006)                                                             | 40                                  |
| <i>Confuciusornis</i>  | multiple (Hou et al., 1995; Chiappe et al., 1999)                                                 | 30                                  |
| <i>Jeholornis</i>      | IVPP V13274, 13553 (Zhou et al., 2002; Zhou and Zhang, 2003b; O'Connor et al., 2013) <sup>1</sup> | 65                                  |
| <i>Microraptor</i>     | IVPP V13352 (Xu et al., 2003; Li et al., 2012)                                                    | 85                                  |
| <i>Sapeornis</i>       | IVPP V13275 (Zhou and Zhang, 2003a; Zheng et al., 2013)                                           | 27                                  |
| <i>Zhongjianornis</i>  | IVPP V15900 (Zhou and Li, 2010)                                                                   | 22                                  |

<sup>1</sup> feathers only in 13553

**Table S5.** Geometry data for physical models of eight fossil paravians, four extant birds, two bats, three pterosaurs, and two shapes for checking calibration. Aspect ratio (*AR*) calculated as  $s^2/S$ .

|                        | area, <i>S</i><br>$\times 10^{-4} \text{ m}^2$ | SVL<br>$\times 10^{-2} \text{ m}$ | TL<br>$\times 10^{-2} \text{ m}$ | span, <i>s</i><br>$\times 10^{-2} \text{ m}$ | <i>AR</i> |
|------------------------|------------------------------------------------|-----------------------------------|----------------------------------|----------------------------------------------|-----------|
| <i>Anchiornis</i>      | 87.11                                          | 7.1                               | 18.0                             | 19.6                                         | 4.4       |
| <i>Archaeopteryx</i>   | 94.57                                          | 8.0                               | 10.5                             | 17.7                                         | 3.4       |
| <i>Confuciusornis</i>  | 50.53                                          | 6.8                               | 9.2                              | 19.9                                         | 7.8       |
| <i>Jeholornis</i>      | 77.03                                          | 7.7                               | 19.0                             | 22.7                                         | 6.8       |
| <i>Microraptor</i>     | 114.6                                          | 9.3                               | 22.5                             | 19.2                                         | 3.2       |
| <i>Sapeornis</i>       | 54.44                                          | 6.6                               | 7.6                              | 20.7                                         | 7.8       |
| <i>Zhongjianornis</i>  | 61.87                                          | 8.3                               | 10.1                             | 21.3                                         | 7.4       |
| <i>Alectoris</i>       | 57.89                                          | 7.1                               | 9.8                              | 15.0                                         | 4.0       |
| <i>Buteo</i>           | 98.55                                          | 8.3                               | 9.9                              | 23.8                                         | 5.8       |
| <i>Columba</i>         | 80.71                                          | 7.3                               | 9.8                              | 19.3                                         | 4.6       |
| <i>Larus</i>           | 72.62                                          | 7.9                               | 10.5                             | 24.0                                         | 8.0       |
| <i>Onychonycteris</i>  | 194.7                                          | 9.6                               | 13.4                             | 29.5                                         | 4.4       |
| <i>Pteropus</i>        | 201.2                                          | 8.4                               | 12.4                             | 35.1                                         | 6.2       |
| <i>Pteranodon</i>      | 42.13                                          | 6.4                               | 6.5                              | 22.1                                         | 11.6      |
| <i>Pterodactylus</i>   | 51.15                                          | 8.4                               | 8.9                              | 19.0                                         | 7.0       |
| <i>Rhamphorhynchus</i> | 78.56                                          | 8.0                               | 18.4                             | 29.7                                         | 11.2      |
| Sphere                 | 11.34                                          |                                   | 3.8                              | 3.8                                          | 1.3       |
| Weathervane            | 39.30                                          |                                   | 24.0                             | 5.0                                          | 0.6       |
